# Supplementary material for: The Effectiveness of Bacteriophages against Methicillin-Resistant Staphylococcus aureus ST398 Nasal Colonization in Pigs
Source: PubMed Central journal article supplement (PMC4972443; doi:10.1371/journal.pone.0160242), 2016-08-03
Supplement: pone.0160242.s001.pdf [file pone.0160242.s001.pdf]

**Supplementary Table 1**

**A Effectivity of Phage K and P68 against human MRSA\***

| EMRSA group | 15   |      |      |      |      |      |      |      |     |      | 16      | 13   | 16    | 15       | 15       | 16   |      |      |      |      |
|-------------|------|------|------|------|------|------|------|------|-----|------|---------|------|-------|----------|----------|------|------|------|------|------|
| strain name | A554 | A552 | A256 | A158 | A782 | A357 | A542 | A417 | A25 | A828 | EMM 286 | EMTI | A1093 | MRSA 252 | MRSA 509 | PM25 | PM77 | PK78 | PM64 | PM79 |
| Phage K     | +    | +    | +    | +    | +    | +    | +    | +    | +   | +    | +       | +    | +     | +        | +        | +    | +    | +    | +    | +    |
| Phage P68   | -    | -    | +    | -    | -    | +    | +    | -    | -   | -    | +       | +    | -     | -        | -        | +    | -    | -    | -    | -    |

\* Strains obtained from Heartlands Hospital, Birmingham; St. George University, London; Johns Hopskin hospital, London, United Kingdom

**B Effectivity of Phage K and P68 against pig MRSA**

| strain name                 | DK-1 | DK-2 | DK-3 | DK-4 | DK-5 | PIL77        | PIL69      | PIL74      | PB40           | SAI356 |
|-----------------------------|------|------|------|------|------|--------------|------------|------------|----------------|--------|
| ST type                     | n.a  | n.a  | n.a  | n.a  | n.a  | n.a          | ST398      | ST398      | ST9            |        |
| Place and year of isolation | n.a  | n.a  | n.a  | n.a  | n.a  | Denmark 2007 | Italy 2008 | Italy 2008 | Hong Kong 2007 |        |
| Phage K                     | -    | -    | +    | -    | -    | +            | +          | -          | +              | +      |
| Phage P68                   | +    | +    | -    | -    | +    | -            | +          | +          | +              | +      |

\* Strains obtained from the Staten Serum Institute, Copenhagen, Denmark

**C Effectivity of Phage K and P68 against MRSA ST398\***

| strain   | 1    | 2    | 3    | 4    | 5    | 6     | 7     | 8     | 9    | 10    |
|----------|------|------|------|------|------|-------|-------|-------|------|-------|
| spa type | t011 | t011 | t899 | t108 | t567 | t108  | t1939 | t108  | t034 | t1451 |
| source   | pig  | pig  | pig  | pig  | pig  | human | pig   | humar | calf | calf  |
| Phage K  | +    | +    | +    | -    | -    | -     | +     | -     | +    | +     |
| Phage 68 | -    | +    | +    | +    | +    | -     | +     | +     | +    | +     |

\* Strains obtained from the Faculty of Veterinary Medicine, Utrecht, The Netherlands

-  infectious: plaques formed at greatest dilution at
-  infectious: less effectivity
-  Non-infectious but able to cause 'lysis from without'
-  Non-infectious and not be able to cause 'lysis from without'
